# Supplementary material for: Burden of disease in patients with Morquio A syndrome: results from an international patient-reported outcomes survey
Source: PubMed Central journal article supplement (PMC4016149; doi:10.1186/1750-1172-9-32), 2014-03-07
Supplement: 1750-1172-9-32-S7.pdf [file 1750-1172-9-32-S7.pdf]

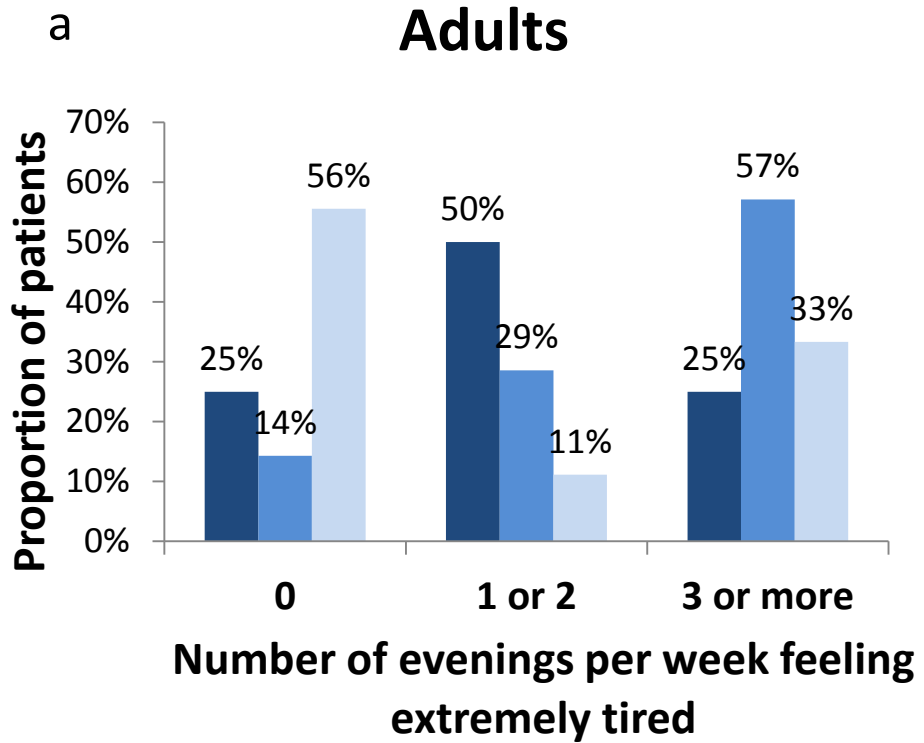

- No wheelchair use (N=4)
- Wheelchair use: only when needed (N=14)
- Wheelchair use: always (N=9)

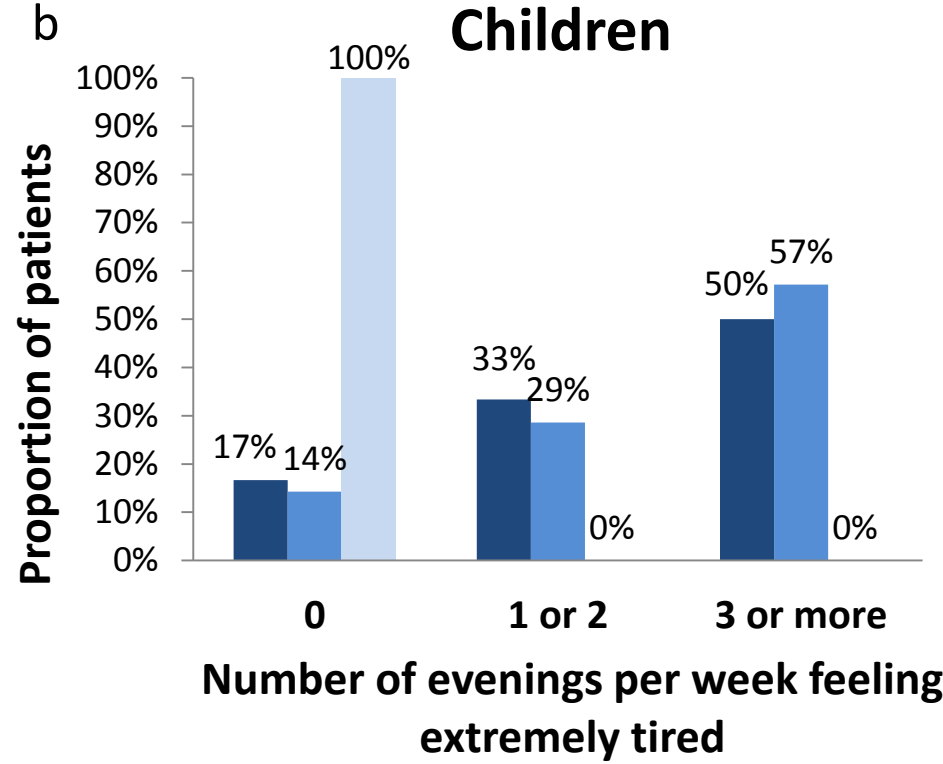

- No wheelchair use (N=18)
- Wheelchair use: when needed (N=14)
- Wheelchair use: always (N=2)
