# Supplementary material for: Burden of disease in patients with Morquio A syndrome: results from an international patient-reported outcomes survey
Source: PubMed Central journal article supplement (PMC4016149; doi:10.1186/1750-1172-9-32), 2014-03-07

# Supplementary material 8

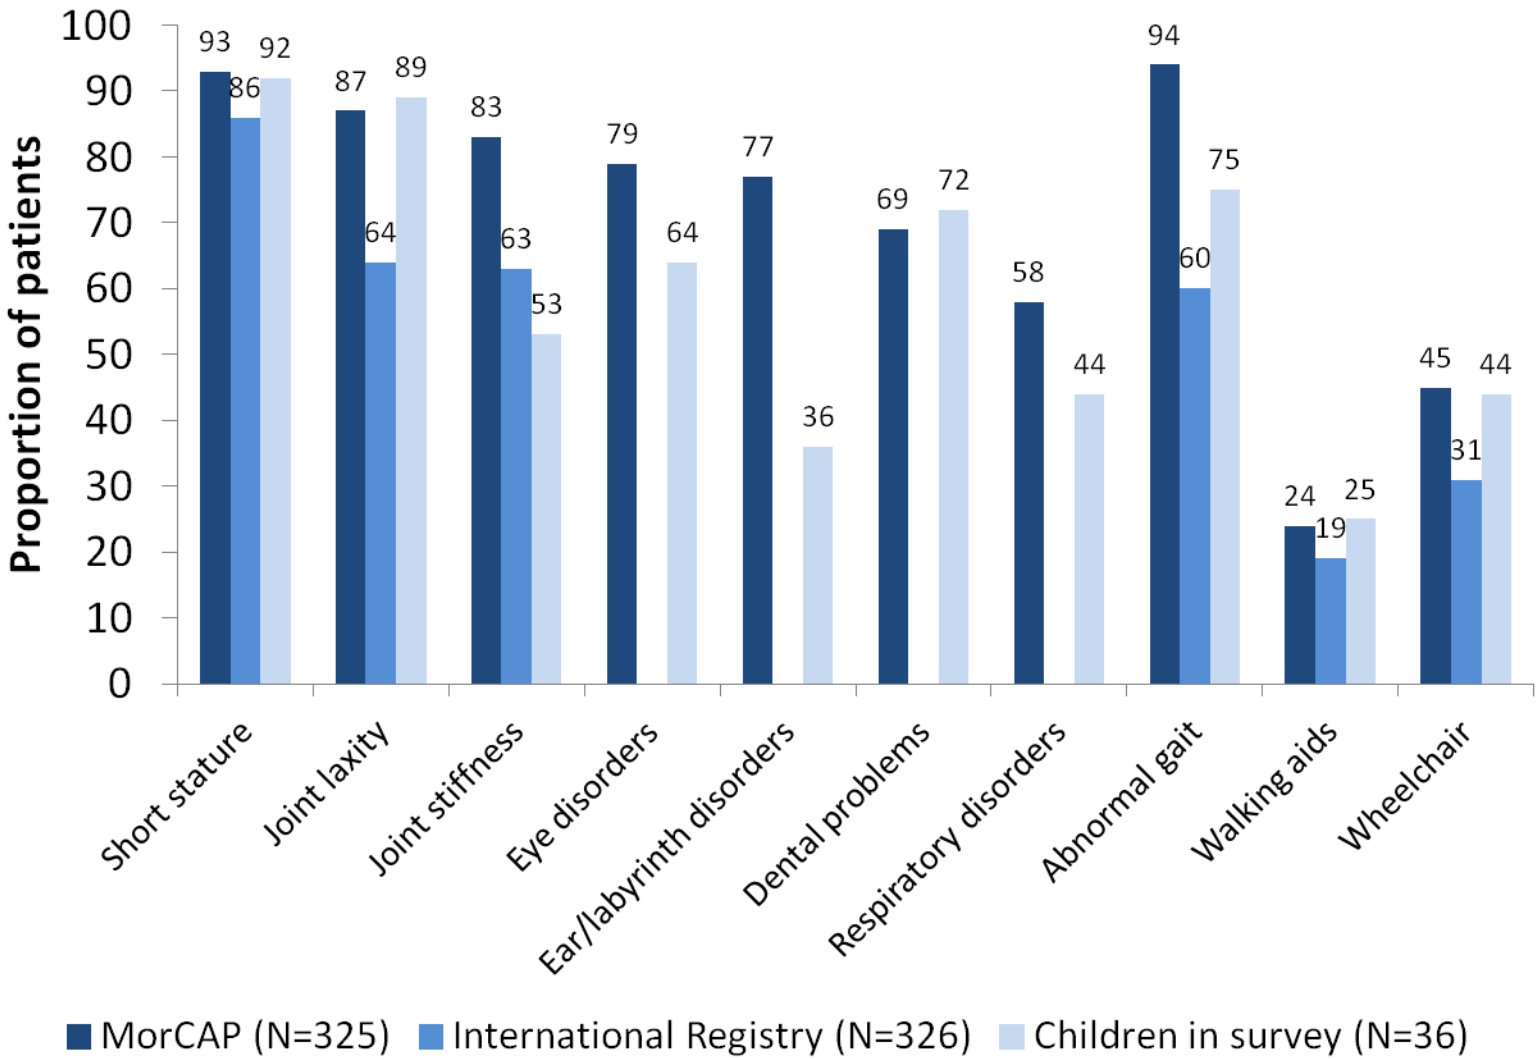

Supplement: 1750-1172-9-32-S8.pdf [file 1750-1172-9-32-S8.pdf]
